# Supplementary material for: Belongingness and Self-efficacy in UK higher education STEM courses: The role of Gender Role Identity
Source: Research Square preprint supplement (doi:10.21203/rs.3.rs-6464037/v1), 2025-05-26
Supplement: Supplementary file 1 [file 54c7f9a4b92e017043694d1b.docx]

# Appendices

## Appendix A - Survey

**1. Demographic information**

1. How do you describe yourself? (check one)

Male

Female

Prefer not to say

Other(please specify) __________________________________________________

2. How old are you?

________________________________________________________________

3. What is your current level of study?

Undergraduate

Postgraduate

Ph.D.

Other(please specify) __________________________________________________

4. The following are some questions about gendered traits, please rate yourself on each question on a scale of 1(very masculine) to 7(very feminine).

A. I consider myself as

B. Ideally, I would like to be

C. Traditionally, my interests would be considered as

D. Traditionally, my attitudes and beliefs would be considered as

E. Traditionally, my behaviour would be considered as

F. Traditionally, my outer appearance would be considered as

5. In which country/countries did you grow up?

6. Please answer the following questions about your perceptions of national scientific achievement, economic development, culture and sense of belonging according to the country where you grew up.

A. I am proud of my country’s scientific achievements

| 1 | 2 | 3 | 4 | 5 |
| --- | --- | --- | --- | --- |
| (Strongly Disagree) |  |  |  | (Strongly Agree) |

B. I am proud of my country’s economic development

| 1 | 2 | 3 | 4 | 5 |
| --- | --- | --- | --- | --- |
| (Strongly Disagree) |  |  |  | (Strongly Agree) |

C. I am very interested in the culture of my country

| 1 | 2 | 3 | 4 | 5 |
| --- | --- | --- | --- | --- |
| (Strongly Disagree) |  |  |  | (Strongly Agree) |

D. I have a sense of belonging to my country

| 1 | 2 | 3 | 4 | 5 |
| --- | --- | --- | --- | --- |
| (Strongly Disagree) |  |  |  | (Strongly Agree) |

7. Please respond to the following questions about how you perceive your parents' expectations for your educational attainment.

A. My parents think that not attending university means failure

| 1 | 2 | 3 | 4 | 5 |
| --- | --- | --- | --- | --- |
| (Strongly Disagree) |  |  |  | (Strongly Agree) |

B. My parents expect me to find a well-paid job in the future

| 1 | 2 | 3 | 4 | 5 |
| --- | --- | --- | --- | --- |
| (Strongly Disagree) |  |  |  | (Strongly Agree) |

C. My parents prefer me to pursue a career in science rather than arts.

| 1 | 2 | 3 | 4 | 5 |
| --- | --- | --- | --- | --- |
| (Strongly Disagree) |  |  |  | (Strongly Agree) |

8. Please write down the name of your current major

________________________________________________________________

9. Do you consider it a STEM subject?

A. Yes

B. No

10. When did you make your major decision that relates to your current major?

A. 11-14

B. 15-18

C. 19-22

D. over 22

**2. Social belongingness**

11. Please answer the following questions regarding your feelings towards your classes, including classmates, professors, and teaching assistants in class.

A. There are times that I feel like I don't belong in the class of my major.

| 1 | 2 | 3 | 4 | 5 | 6 | 7 |
| --- | --- | --- | --- | --- | --- | --- |
| (Strongly Disagree) |  |  |  |  |  | (Strongly Agree) |

B. I felt like an outsider in the class of my major.

| 1 | 2 | 3 | 4 | 5 | 6 | 7 |
| --- | --- | --- | --- | --- | --- | --- |
| (Strongly Disagree) |  |  |  |  |  | (Strongly Agree) |

C. I don't know if I really belong in the field of my major.

| 1 | 2 | 3 | 4 | 5 | 6 | 7 |
| --- | --- | --- | --- | --- | --- | --- |
| (Strongly Disagree) |  |  |  |  |  | (Strongly Agree) |

D. I am certain that I belong in my major.

| 1 | 2 | 3 | 4 | 5 | 6 | 7 |
| --- | --- | --- | --- | --- | --- | --- |
| (Strongly Disagree) |  |  |  |  |  | (Strongly Agree) |

E. I am not sure I have the right background for my major.

| 1 | 2 | 3 | 4 | 5 | 6 | 7 |
| --- | --- | --- | --- | --- | --- | --- |
| (Strongly Disagree) |  |  |  |  |  | (Strongly Agree) |

**3. Self-efficacy**

12. Please answer the following questions regarding your performance in your major.

A. I believe I will receive an excellent grade in my major.

| 1 | 2 | 3 | 4 | 5 | 6 | 7 |
| --- | --- | --- | --- | --- | --- | --- |
| (Strongly Disagree) |  |  |  |  |  | (Strongly Agree) |

B. I’m certain I can understand the most difficult material presented in the readings for courses of my major.

| 1 | 2 | 3 | 4 | 5 | 6 | 7 |
| --- | --- | --- | --- | --- | --- | --- |
| (Strongly Disagree) |  |  |  |  |  | (Strongly Agree) |

C. I’m confident I can understand the basic concepts taught in courses of my major.

| 1 | 2 | 3 | 4 | 5 | 6 | 7 |
| --- | --- | --- | --- | --- | --- | --- |
| (Strongly Disagree) |  |  |  |  |  | (Strongly Agree) |

D. I’m confident I can understand the most complex material presented by the instructor in courses of my major.

| 1 | 2 | 3 | 4 | 5 | 6 | 7 |
| --- | --- | --- | --- | --- | --- | --- |
| (Strongly Disagree) |  |  |  |  |  | (Strongly Agree) |

E. I’m confident I can do an excellent job on the assignment and tests in courses of my major.

| 1 | 2 | 3 | 4 | 5 | 6 | 7 |
| --- | --- | --- | --- | --- | --- | --- |
| (Strongly Disagree) |  |  |  |  |  | (Strongly Agree) |

F. I expect to do well in the class of my major.

| 1 | 2 | 3 | 4 | 5 | 6 | 7 |
| --- | --- | --- | --- | --- | --- | --- |
| (Strongly Disagree) |  |  |  |  |  | (Strongly Agree) |

G. I’m certain I can master the skills being taught in the class of my major.

| 1 | 2 | 3 | 4 | 5 | 6 | 7 |
| --- | --- | --- | --- | --- | --- | --- |
| (Strongly Disagree) |  |  |  |  |  | (Strongly Agree) |

H. Considering the difficulty of this course, the teacher, and my skills, I think I will do well in courses of my major.

| 1 | 2 | 3 | 4 | 5 | 6 | 7 |
| --- | --- | --- | --- | --- | --- | --- |
| (Strongly Disagree) |  |  |  |  |  | (Strongly Agree) |

**4. Self-stereotyping**

13. Please mark down how much you agreed with the following statements based on your experience in your major:

A. I worry that my ability to perform well on tests is affected by my gender.

| 1 | 2 | 3 | 4 | 5 | 6 | 7 |
| --- | --- | --- | --- | --- | --- | --- |
| (Strongly Disagree) |  |  |  |  |  | (Strongly Agree) |

B. I feel confident in my ability to perform well on tests, regardless of my gender.

| 1 | 2 | 3 | 4 | 5 | 6 | 7 |
| --- | --- | --- | --- | --- | --- | --- |
| (Strongly Disagree) |  |  |  |  |  | (Strongly Agree) |

C. I worry that if I perform poorly on tests, others will attribute my poor performance to my gender.

| 1 | 2 | 3 | 4 | 5 | 6 | 7 |
| --- | --- | --- | --- | --- | --- | --- |
| (Strongly Disagree) |  |  |  |  |  | (Strongly Agree) |

D. I am proud of my performance on tests, and I know that my success is a result of my own efforts and abilities.

| 1 | 2 | 3 | 4 | 5 | 6 | 7 |
| --- | --- | --- | --- | --- | --- | --- |
| (Strongly Disagree) |  |  |  |  |  | (Strongly Agree) |

E. I worry that, because I know the negative stereotype about my gender and my major, my anxiety about confirming that stereotype will negatively influence how I perform on the tests.

| 1 | 2 | 3 | 4 | 5 | 6 | 7 |
| --- | --- | --- | --- | --- | --- | --- |
| (Strongly Disagree) |  |  |  |  |  | (Strongly Agree) |

F. I am motivated to do my best on tests, and I believe that my hard work and dedication will lead to success, regardless of any negative stereotypes that exist.

| 1 | 2 | 3 | 4 | 5 | 6 | 7 |
| --- | --- | --- | --- | --- | --- | --- |
| (Strongly Disagree) |  |  |  |  |  | (Strongly Agree) |

14. Please provide any additional thoughts or comments you have about gender roles, culture, parental expectations, and stereotyping that you feel, which are important for us to explain the uneven gender representation in the STEM area. Your feedback will help us gain a better understanding of the issues and experiences that affect all students, regardless of their gender or academic discipline.

________________________________________________________________

## Appendix B - Reliability of Sub-Scales

| Reliability | Cronbach's Alpha |
| --- | --- |
| TMF scale(6 items) | 0.961 |
| National identity  (4 items) | 0.700 |
| Parental expectations  (3 items) | 0.759 |
| Belongingness (5 items) | 0.895 |
| Self-efficacy (8 items) | 0.937 |
| Self-stereotyping  (6 items) | 0.790 |

|  |
| --- |

## Appendix C - Exploratory factor analysis of TMF Scale

| TMF scale | Communalities |
| --- | --- |
| Item 1 | .61 |
| Item 2 | .58 |
| Item 3 | .50 |
| Item 4 | .46 |
| Item 5 | .67 |
| Item 6 | .62 |

## Appendix D - Exploratory Factor Analysis of National Identity Scale

| National Identity scale | Factor 1 | Factor 2 | Communalities |
| --- | --- | --- | --- |
| Item 1 | .046 | .888 | .791 |
| Item 2 | .244 | .826 | .742 |
| Item 3 | .911 | .104 | .840 |
| Item 4 | .897 | .182 | .838 |
| Eigenvalue | 1.696 | 1.515 |  |
| % of variance explained | 42.402% | 37.886% |  |

## Appendix E - Exploratory Factor Analysis of Perceived Parental Expectation Scale

| Perceived parental expectation scale | Factor 1 | Communalities |
| --- | --- | --- |
| Item 1 | .831 | .691 |
| Item 2 | .834 | .695 |
| Item 3 | .799 | .638 |

## Appendix F - Exploratory Factor Analysis of Self-belongingness Scale

| *Self-belongingness Scale* | Factor 1 | Communalities |
| --- | --- | --- |
| Item 1 | .889 | .790 |
| Item 2 | .896 | .803 |
| Item 3 | .927 | .859 |
| Item 4 | .791 | .626 |
| Item 5 | .649 | .421 |

## Appendix G - Exploratory Factor Analysis of Self-efficacy Scale

| *Self-efficacy Scale* | Factor 1 | Communalities |
| --- | --- | --- |
| Item 1 | .788 | .622 |
| Item 2 | .803 | .645 |
| Item 3 | .682 | .465 |
| Item 4 | .800 | .641 |
| Item 5 | .863 | .745 |
| Item 6 | .863 | .744 |
| Item 7 | .854 | .730 |
| Item 8 | .901 | .812 |

## Appendix H - Exploratory Factor Analysis of Self-stereotyping Scale

| *Self-stereotyping Scale* | Factor 1 | Factor 2 | Communalities |
| --- | --- | --- | --- |
| Item 1 | .717 | -.447 | .714 |
| Item 2 | .641 | .479 | .640 |
| Item 3 | .707 | -.542 | .794 |
| Item 4 | .608 | .612 | .744 |
| Item 5 | .803 | -.394 | .800 |
| Item 6 | .592 | .576 | .682 |
| Eigenvalue | 2.790 | 1.584 |  |
| % of variance explained | 46.495% | 26.407% |  |
